# Supplementary material
Source: PubMed Central journal article supplement (PMC4607670)
Supplement: NIHMS721299-supplement-1.pdf [file NIHMS721299-supplement-1.pdf]

**Cell Reports**

**Supplemental Information**

**Akt kinase-mediated checkpoint of cGAS DNA sensing pathway**

Gil Ju Seo, Aerin Yang, Brandon Tan, Sungyoon Kim, Qiming Liang, Younho Choi,  
Weiming Yuan, Pinghui Feng, Hee-Sung Park, and Jae U. Jung

1 **SUPPLEMENTAL FIGURE LEGEND**

2

3 **Figure S1. Structurally and functionally conserved cGAS and OAS1 have similar Akt**  
4 **substrate motifs.**

5 (A) Immunoprecipitated human cGAS-Flag was fractionated with SDS-PAGE and the expected  
6 cGAS band was digested with trypsin and peptides were identified by mass spectrometry. Each  
7 peptide shows the probability of phosphorylation (Ascore). The first phosphopeptide listed has a  
8 highly significant value (Ascore of greater than 18 is experimentally reliable).

9 (B) Sequence comparison of the putative cGAS phosphorylation site from the six indicated  
10 species.

11 (C) Akt phosphorylation target site predicted in both human and mouse cGAS and OAS1. It  
12 indicates two catalytically important sites (blue-colored) and one putative Akt phosphorylation  
13 site (red-colored). See also Figure 1.

14

15 **Figure S2. Akt1 kinase phosphorylates human cGAS.**

16 (A) Human cGAS-Flag was immunoprecipitated with anti-Flag M2 beads from lysates of 293T  
17 cells transiently transfected with vector or human cGAS-Flag and with or without HA-myr-Akt1  
18 for 24 hours. Cells were treated for 8 h before harvesting with Akt1/Akt2 selective inhibitor VIII,  
19 as indicated. The immunoprecipitates were probed with an Akt phosphosubstrate antibody.  
20 WCLs were probed with Akt phosphosubstrate, Flag, PanAkt, and Actin (loading control)  
21 antibodies. See also Figure 1.

22

23 **Figure S3. Akt negatively regulates cGAS-mediated IFN- $\beta$  production.**

24 (A) RAW 264.7 cells were electroporated with a construct of empty vector or myr-Akt1. At 48 h  
25 post-transfection, cells were treated with mock, pdAdT or HT-DNA stimulation for 9 hours , or  
26 infected with HSV-1 (moi = 5) for 12 hours. The expression of IFN- $\beta$  mRNA was measured by  
27 real-time PCR.

28 (B) RAW 264.7 cells were treated with 5 $\mu$ M Akt1/2 selective inhibitor VIII or DMSO vehicle.  
29 Cells were treated with mock, pdAdT or HT-DNA stimulation for 9 hours, or infected with HSV-1  
30 (moi = 5) for 12 hours. The expression of IFN- $\beta$  mRNA was measured by real-time PCR.

31 (C) L929 cGAS<sup>-/-</sup> cells complemented with empty vector or mouse cGAS WT (mWT) or mouse  
32 cGAS S291A were treated with 5 $\mu$ M Akt1/2 selective inhibitor VIII or DMSO vehicle and  
33 stimulated with cGAMP (3 $\mu$ g/ml) for 10 hours. The expression of IFN- $\beta$  mRNA was measured  
34 by real-time PCR.

35 (D) L929 cell lines used in (C) were stimulated with cGAMP (3µg/ml) for 18 hours. The  
36 production of IFN-β was measured by ELISA. \* p<0.05. See also Figure 4.

37

38 **Figure S4. Akt1 specifically regulates cGAS enzymatic activity and ultimately affects IFN-**  
39 **β induction.**

40 (A) *In vitro* enzymatic assays were performed in the presence of P<sup>32</sup>-α-GTP with mouse cGAS  
41 (aa141-507) WT and cGAS S291A purified from *E. coli*. Mock or immunoprecipitated active Akt1  
42 was added to the purified cGAS WT or S291 protein in the presence of P<sup>32</sup>-α-GTP. cGAMP  
43 production was analyzed by TLC and autoradiograph (top right panel). The bottom arrow shows  
44 the spotted origin and the top arrow shows the migrated cGAMP.

45 (B) cGAMP Bio-assay. L929 cells were stimulated with HT-DNA (2µg/ml) for 9 hours. Extracts of  
46 the cells were prepared, treated with Benzonase and heat, and incubated with permeabilized  
47 THP1- Lucia ISG cells for 18 hours. Reporter cells were added with 200 nM cGAMP as a  
48 positive control. Relative luciferase activity was measured. \* p<0.05. See also Figure 4.

49

50 **Figure S5. Akt antagonizes cGAS-mediated IFN response upon infection with DNA**  
51 **viruses**

52 (A) L929 cGAS<sup>-/-</sup> cells were stably complemented with empty vector, mouse cGAS WT (mWT),  
53 or S291A. The expression of IFN-β mRNA was measured by real-time PCR after infection with  
54 MVA (moi = 5) for 10 hours.

55 (B) L929 cGAS<sup>-/-</sup> cells stably transfected with cGAS-Flag were infected with 5 moi HSV-1 for  
56 indicated times. Mouse cGAS-Flag (cGAS-Flag) was then immunoprecipitated with anti-Flag M2  
57 beads and the immunoprecipitates and whole cell lysates (WCLs) were probed with P-Akt  
58 substrate, pAKT S473, PanAkt, Actin and Flag antibodies.

59 (C) L929 cGAS<sup>-/-</sup> cells were stably complemented with mouse cGAS WT (mWT), or S291A.  
60 The expression of IFN-β mRNA was measured by real-time PCR after infection with HSV-1 WT  
61 (moi = 5) for indicated times.

62 (D) The S291A mutation enhances cGAS-mediated antiviral activity toward HSV-1 infection.  
63 L929 cGAS<sup>-/-</sup> cells stably complemented with empty vector, mouse cGAS WT (mWT) or S291A  
64 were infected with HSV-1 ICPΔ34.5 (moi = 0.1, A) for indicated times. Viral supernatants were  
65 collected at indicated times and titered using plaque assays on Vero cells. \* p<0.05. See also  
66 Figures S5 and S6.

67

68

A

| Peptide                              | Ascore Seq                       | Ascore |
|--------------------------------------|----------------------------------|--------|
| R.GGS#PAVTLLISEK.I                   | GGS#PAVTLLISEK                   | 71.2   |
| R.GAPM*DPT#ESPAAPEAALPK.A            | GAPM*DPT#ESPAAPEAALPK            | 6      |
| R.DDIS#TAAGM*VK.G                    | DDIS#TAAGM*VK                    | 7.4    |
| R.AQDTQPSDATS#APGAEGLEPPAAREPALS.R.A | AQDTQPSDATS#APGAEGLEPPAAREPALS.R | 6.5    |
| R.AQDTQPSDATS#APGAEGLEPPAAREPALS.R.A | AQDTQPS#DATSAPGAEGLEPPAAREPALS.R | 0      |
| R.AQDTQPS#DATSAPGAEGLEPPAARE.E       | AQDTQPS#DATSAPGAEGLEPPAARE       | 7.5    |

B

Akt substrate motif: **R<sub>x</sub>R<sub>xx</sub>S\***  
**K<sub>x</sub>K<sub>xx</sub>T\***

Human cGAS: **RKRGG**<sub>305</sub> PA  
 Mouse cGAS: **KEKPG**<sub>291</sub> PA  
 Rat cGAS: **EEKPG**<sub>294</sub> PA  
 Dog cGAS: **KKKRG**<sub>294</sub> PA  
 Chicken cGAS: **RKKRG**<sub>268</sub> PA  
 Lizard cGAS: **KKRPG**<sub>383</sub> PA  
 Consensus: **R<sub>x</sub>R<sub>xx</sub>S\***  
**K<sub>x</sub>K<sub>xx</sub>T\***

C

Akt substrate motif: **R<sub>x</sub>R<sub>xx</sub>S\***  
**K<sub>x</sub>K<sub>xx</sub>T\***

### Human cGAS

VSPGGLPVSAPILVRRDAAPGASKLRVLEKLLSRDDISTAAGMVKGVVDHLLLRLKCDLAFRGVLLNTGSYYEHVKISAP  
 NE<sub>225</sub>FD<sub>227</sub>VMFKLEVPRIQLEEYSNTRAYYFVKFKRNPKENPLSQFLEGEILSASKMLSFRKIIKEEINDIKD TDVIMK  
**RKRGG**<sub>305</sub> PAVTLLISE<sub>319</sub> KISVDITLALESKSSWPASTQEGLRIQNWLSAKVRK

### Mouse cGAS

RGRSRKEPDKLKKVLDKLRKRDISEAAETVNVKVERLLRRMQKRESEFKGVEQLNTGSYYEHVKISAPNE<sub>211</sub>FD<sub>213</sub>VMFKL  
 EVPRIELQEYYETGAFYLVKFKRIPRGNPLSHFLEGEVLSATKMLSFRKIIKEEVKEIKDIDVSVE**KEKPG**<sub>291</sub> PAVTLLIRNP  
**E**<sub>302</sub> EISVDIILALESKGSWPSTKEGLPIQGWLGTKVVRTNLRREPFYLVPK

### Human OAS1

MMDLRNTPAKSLDKFIEDYLLPDTCFRMQINHAIDIICGFLKERCFRGSSYPVCVSKVVKGGSSGKGTTLRGRSD<sub>75</sub>AD<sub>77</sub>LVVF  
 LSPLTTTFQDQLNRRGEFIQERRQLEACQ**RERAF**<sub>116</sub> VKFEVQAPRWGNPRALSFVLSSLQLGEGVEFD<sub>148</sub> VLPAFDALGQLT

### Mouse OAS1

MEQDLRSIPASKLDFIENHLPDTSFCADLREVIDALCALLKDRFFRGPVRRMRASKGVKKGCTALKGRSD<sub>71</sub>AD<sub>73</sub>LVVFLNN  
 LTYFEDQLNQQGVLIKEIKKQLYEVQHERRFGVKFEVQSLRSP**NSRALS**<sub>129</sub> FKLSAPDLLKEVKFD<sub>144</sub> VLPAYDLLDHLNILKKP  
 NQQFYANLISGRTPGKEGKLLTCFMGLRKYFLNCRPTKLRILHLVTHWYQLCKEK

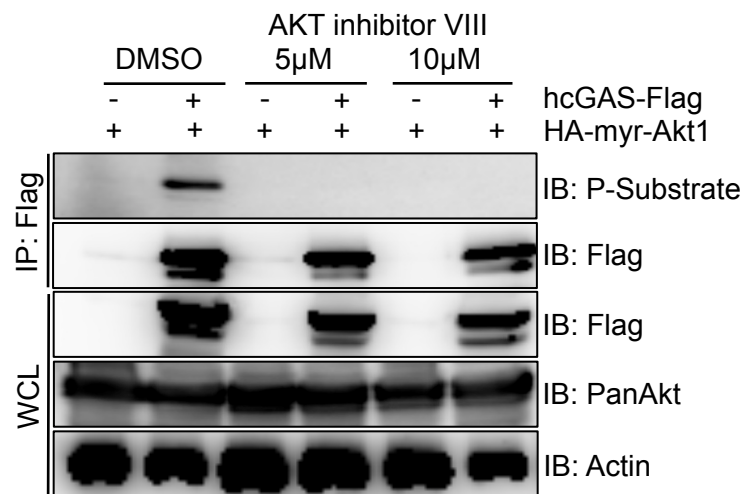

**Figure S2**

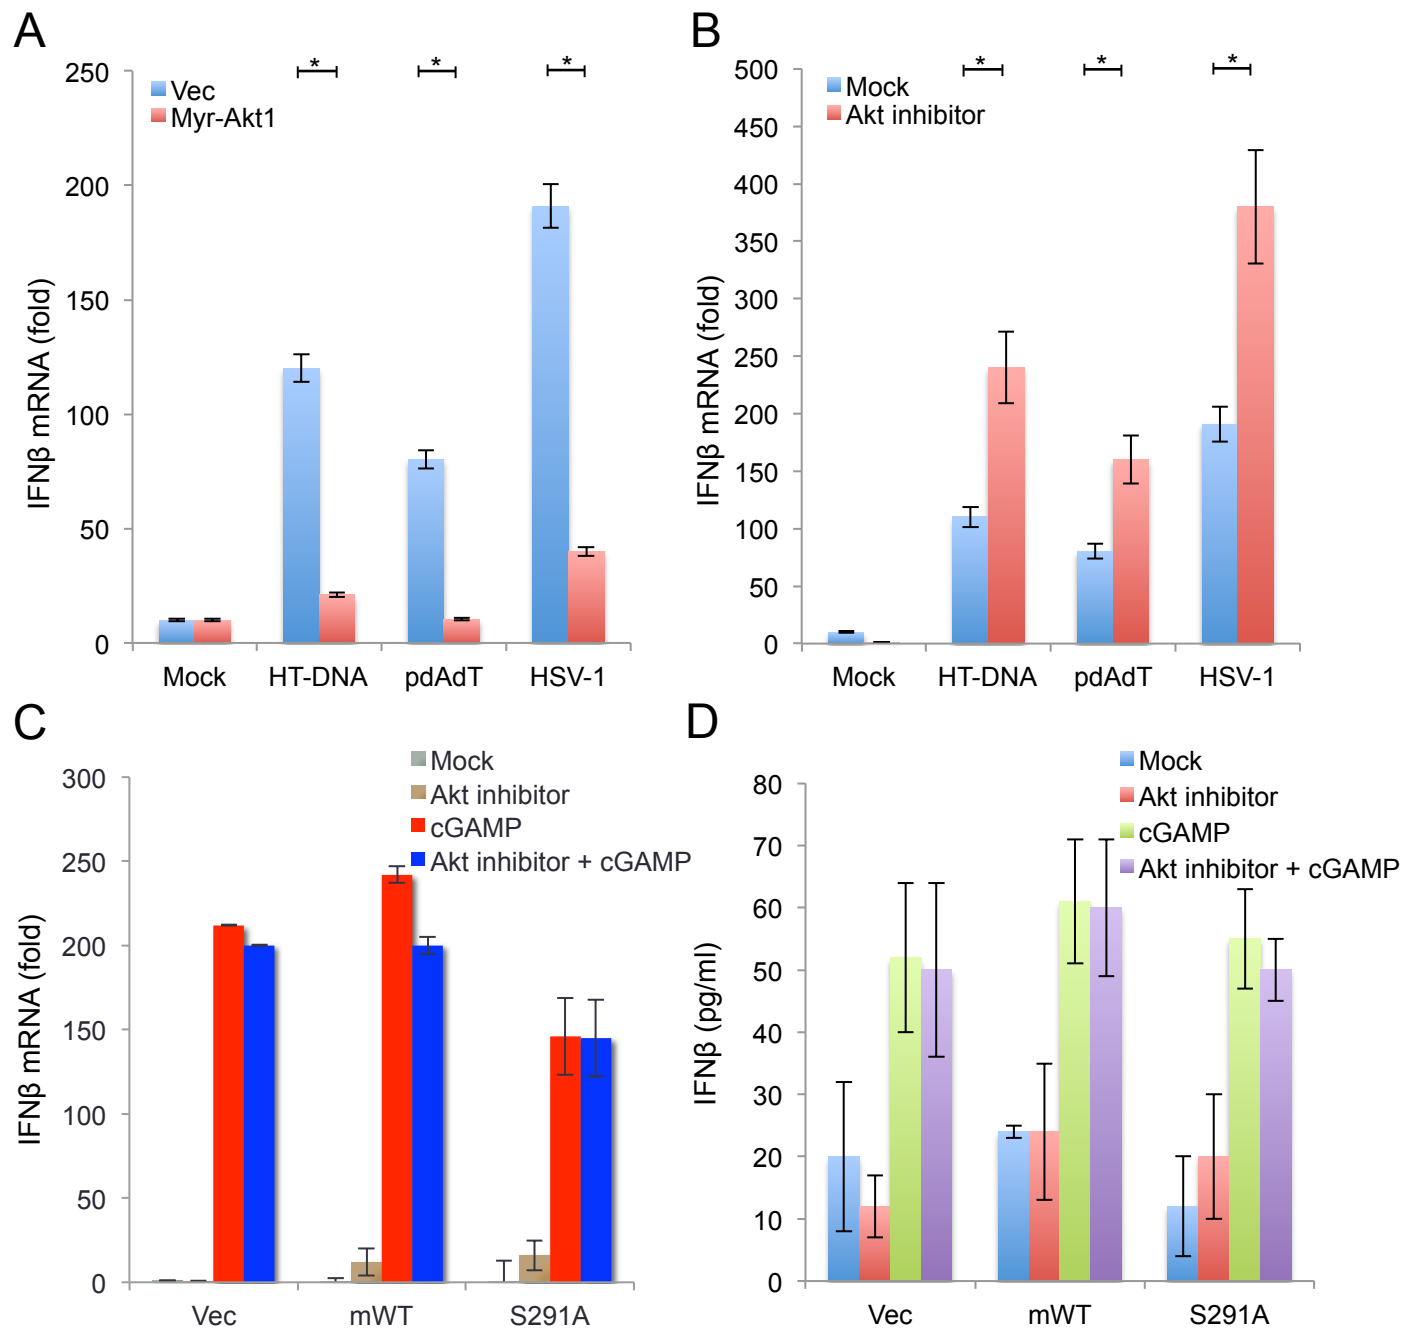

**Figure S3**

A

|   |   |   |   |   |             |
|---|---|---|---|---|-------------|
| - | - | + | - | + | mcGAS pS291 |
| - | + | - | + | - | mcGAS WT    |
| - | - | - | + | + | Akt1        |

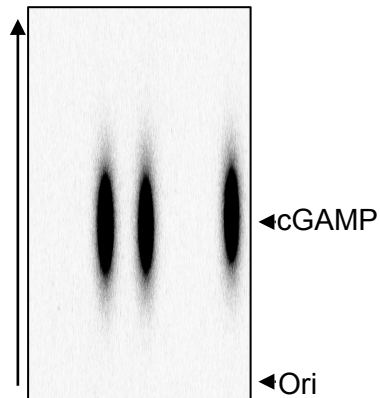

B

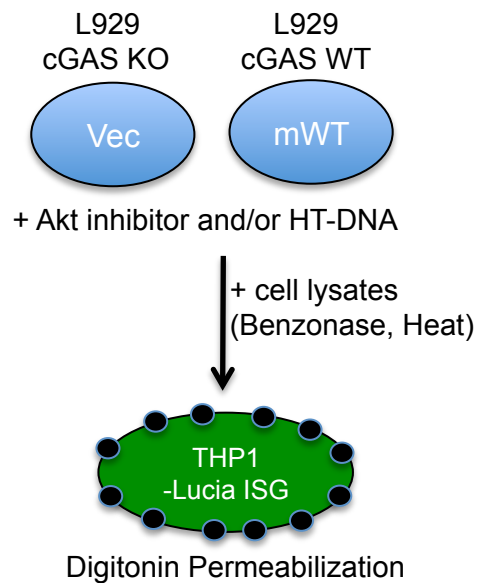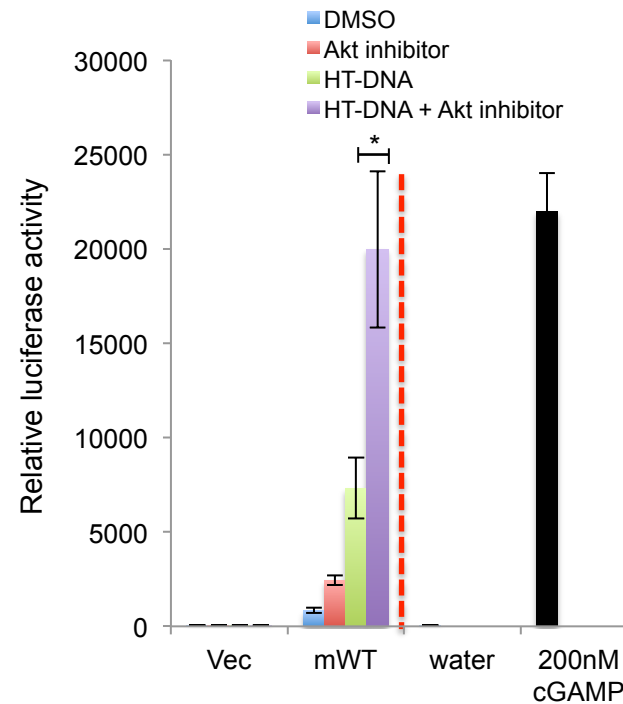

Figure S4

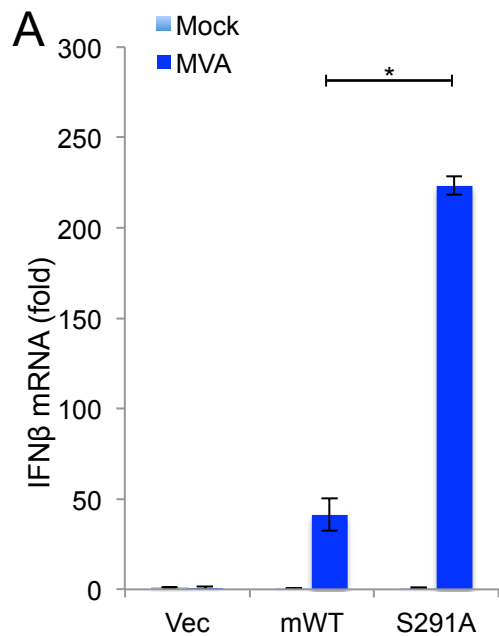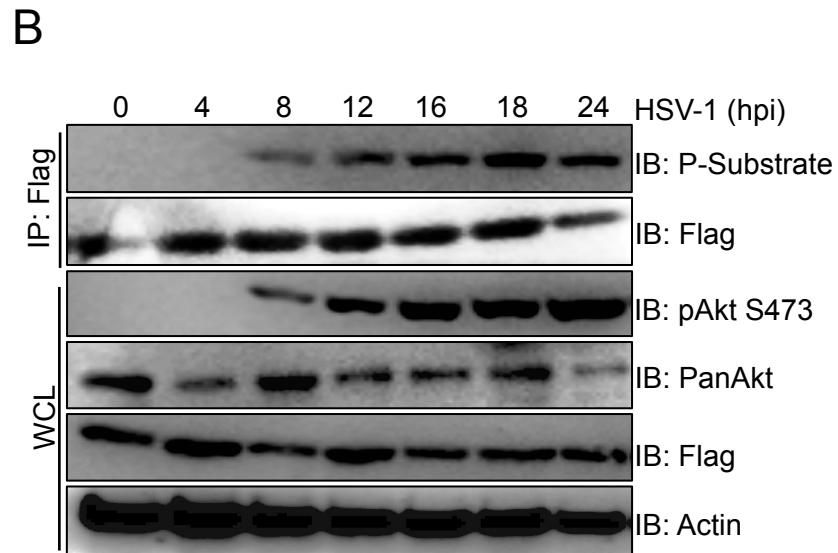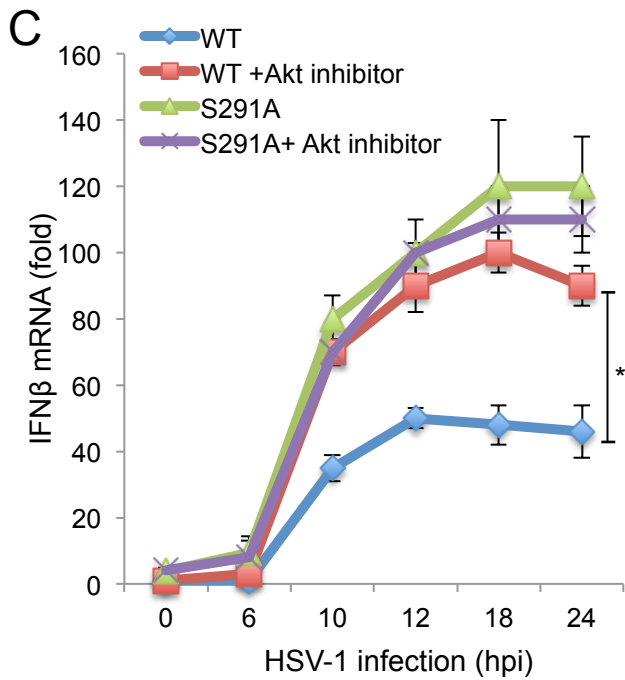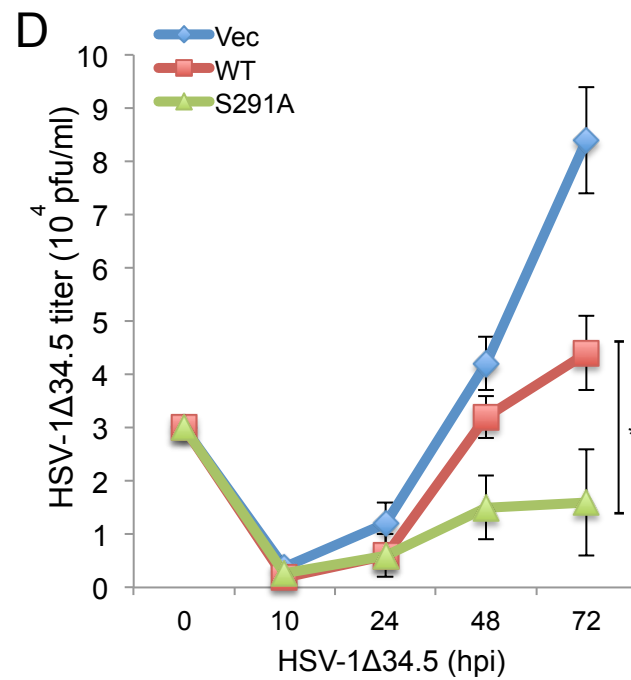

**Figure S5**
